# Supplementary material for: Synthesis of 4-Methoxybenzoylhydrazones and Evaluation of Their Antiglycation Activity
Source: MDPI journal article supplement (doi:10.3390/molecules19011286), 2014-01-21

# Supplementary Materials

Figure S1. Compound 30.

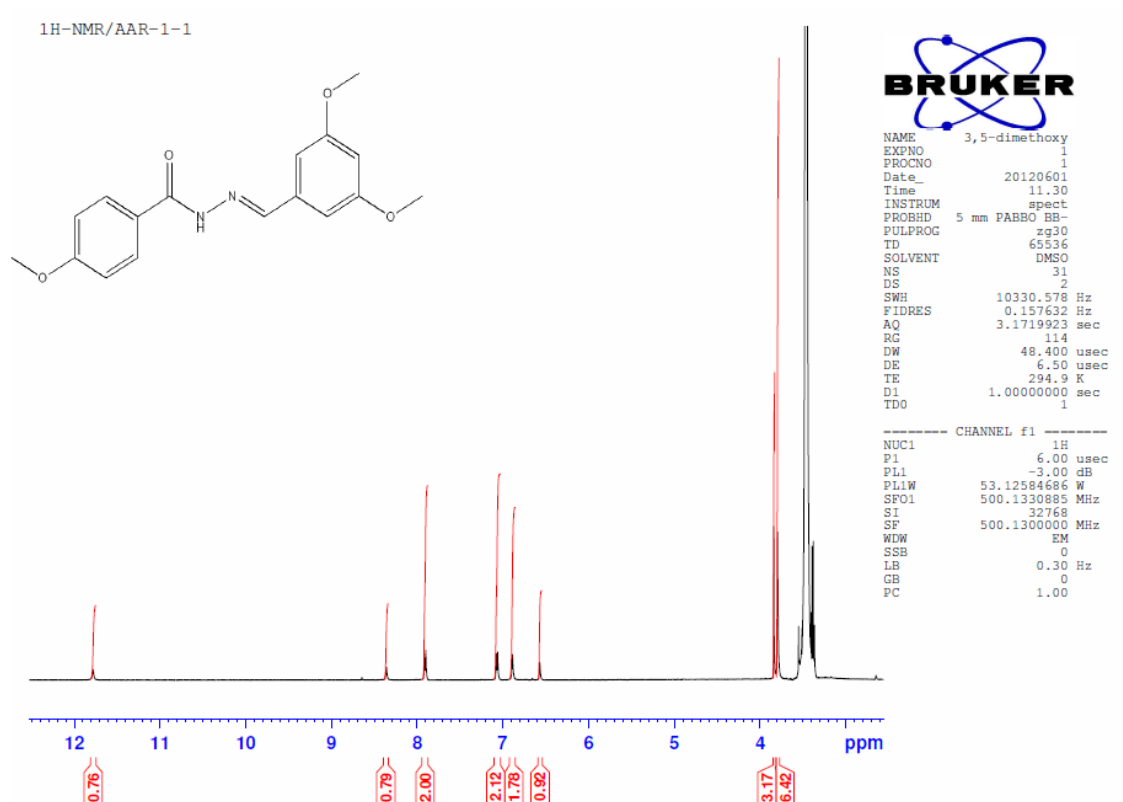

Figure S2. Compound 3.

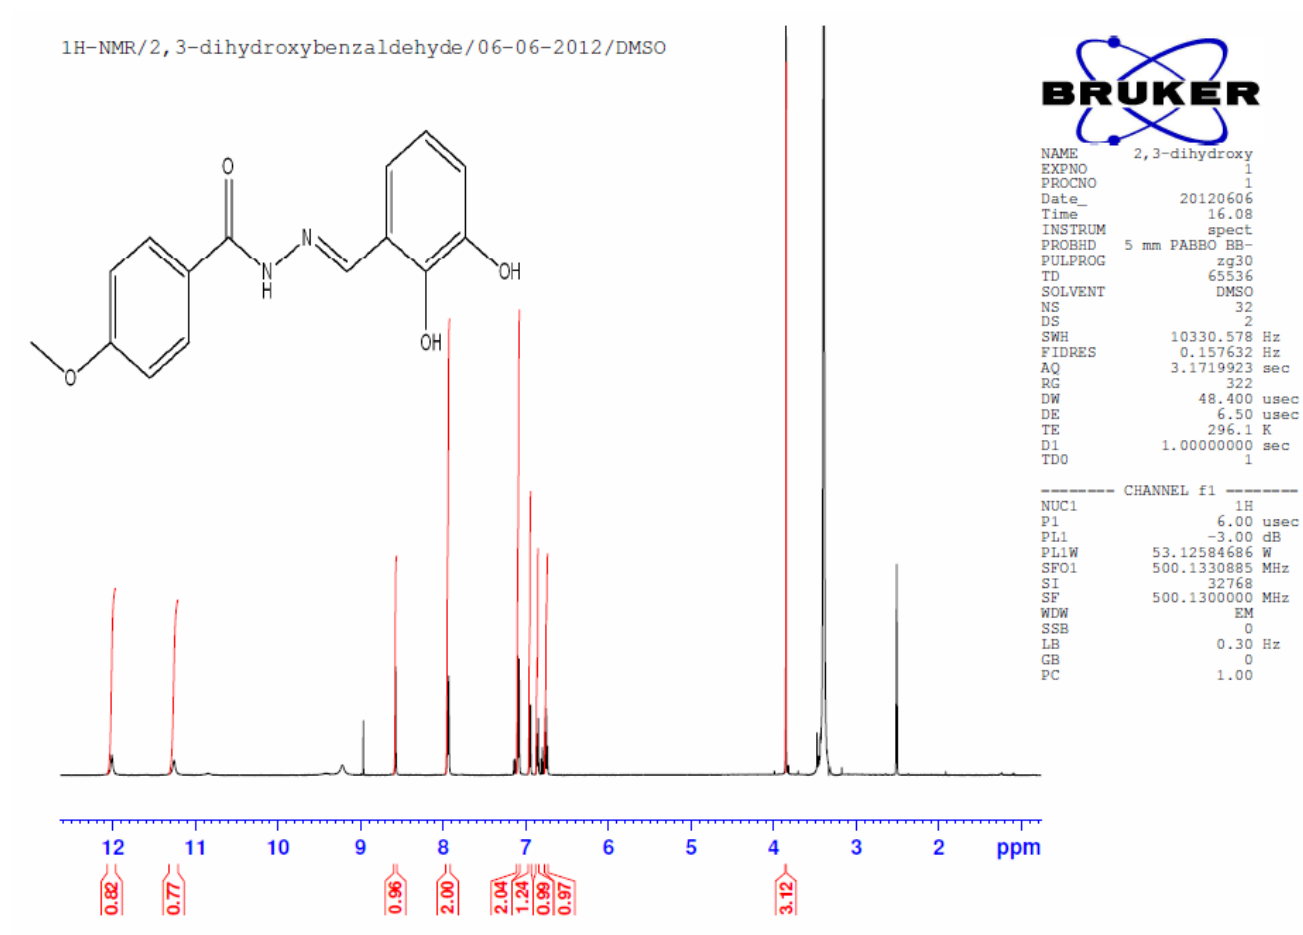

Figure S3. Compound 4.

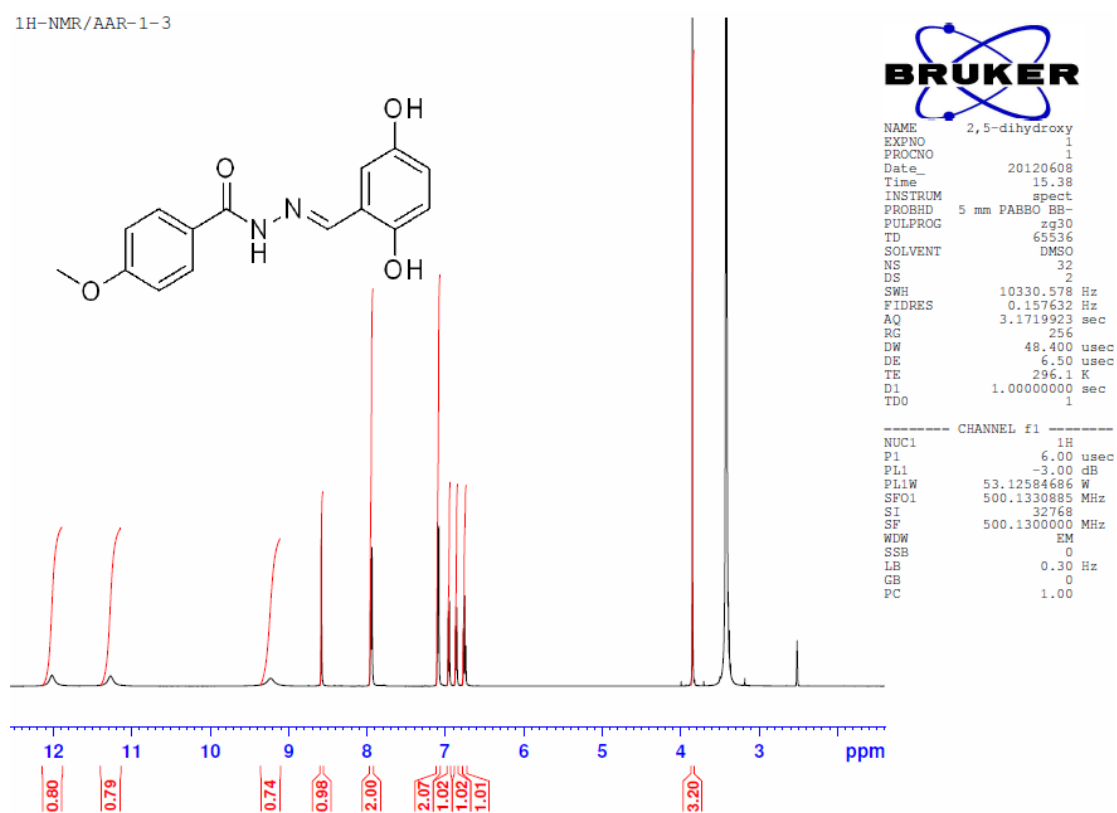

Figure S4. Compound 11.

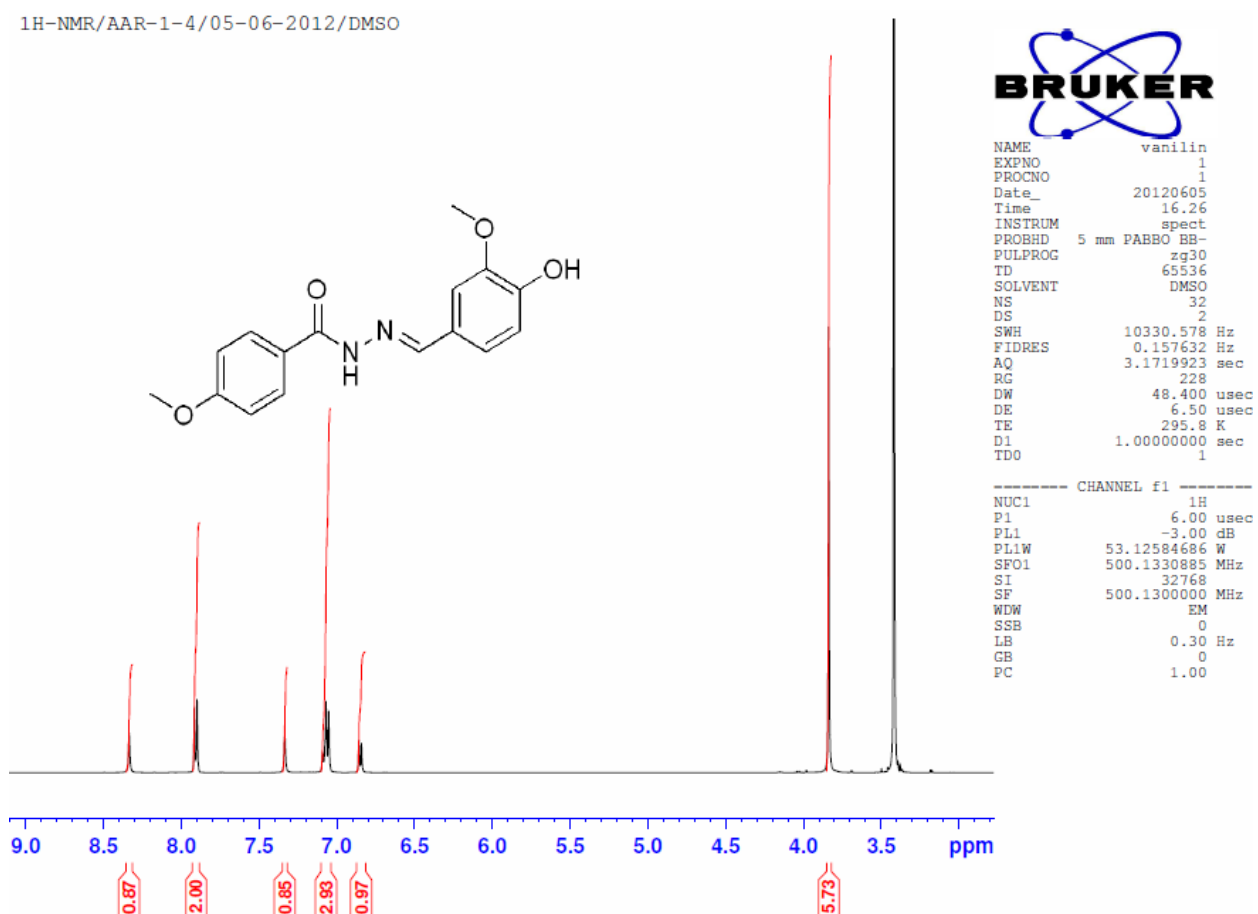

Figure S5. Compound 12.

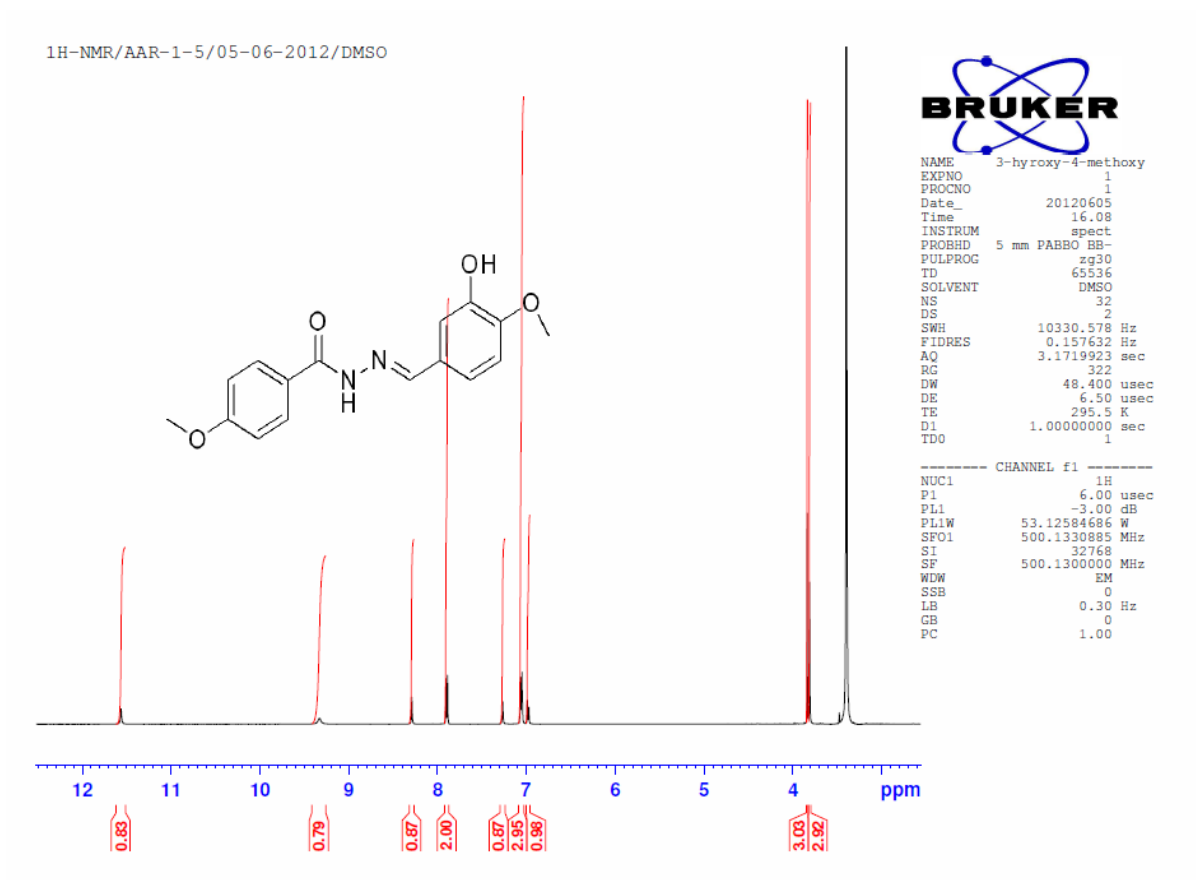

Figure S6. Compound 5.

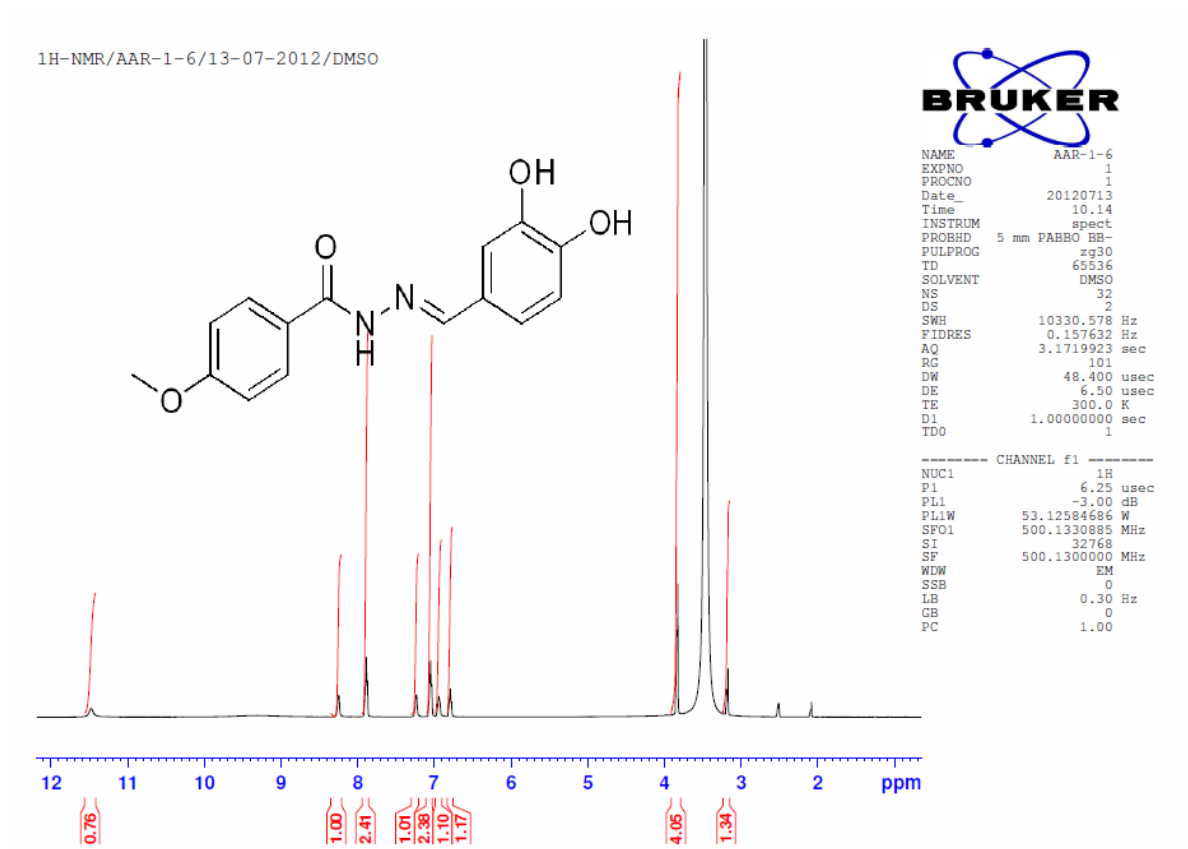

Figure S7. Compound 29.

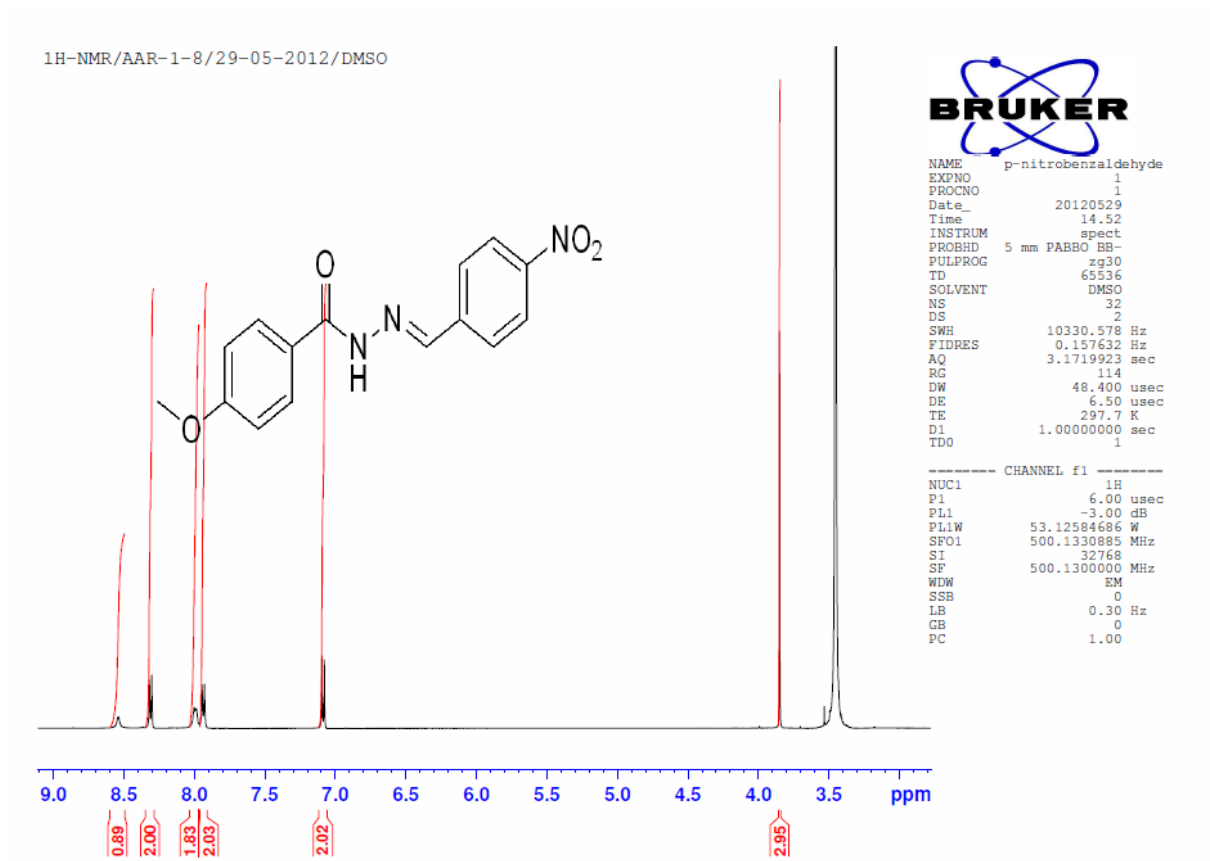

Figure S8. Compound 8.

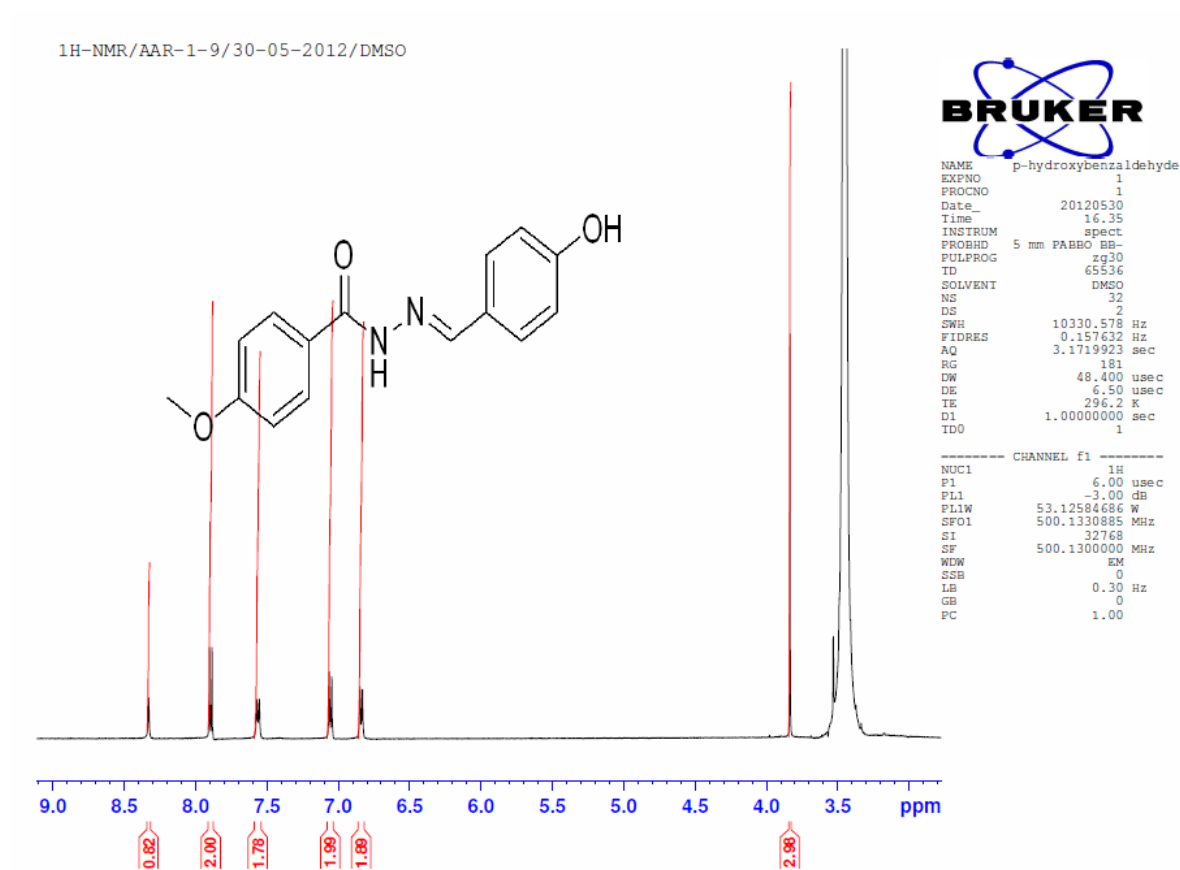



Figure S9. Compound 6.

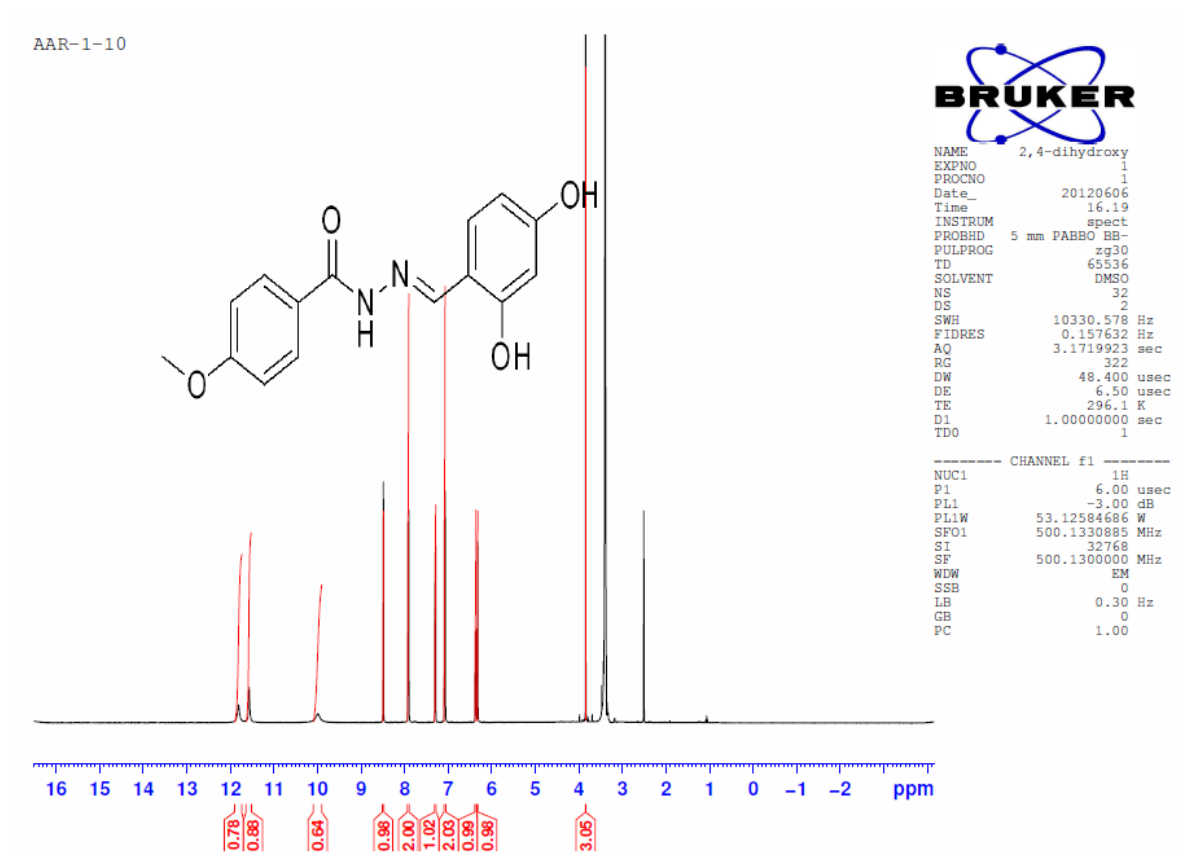

Figure S10. Compound 9.

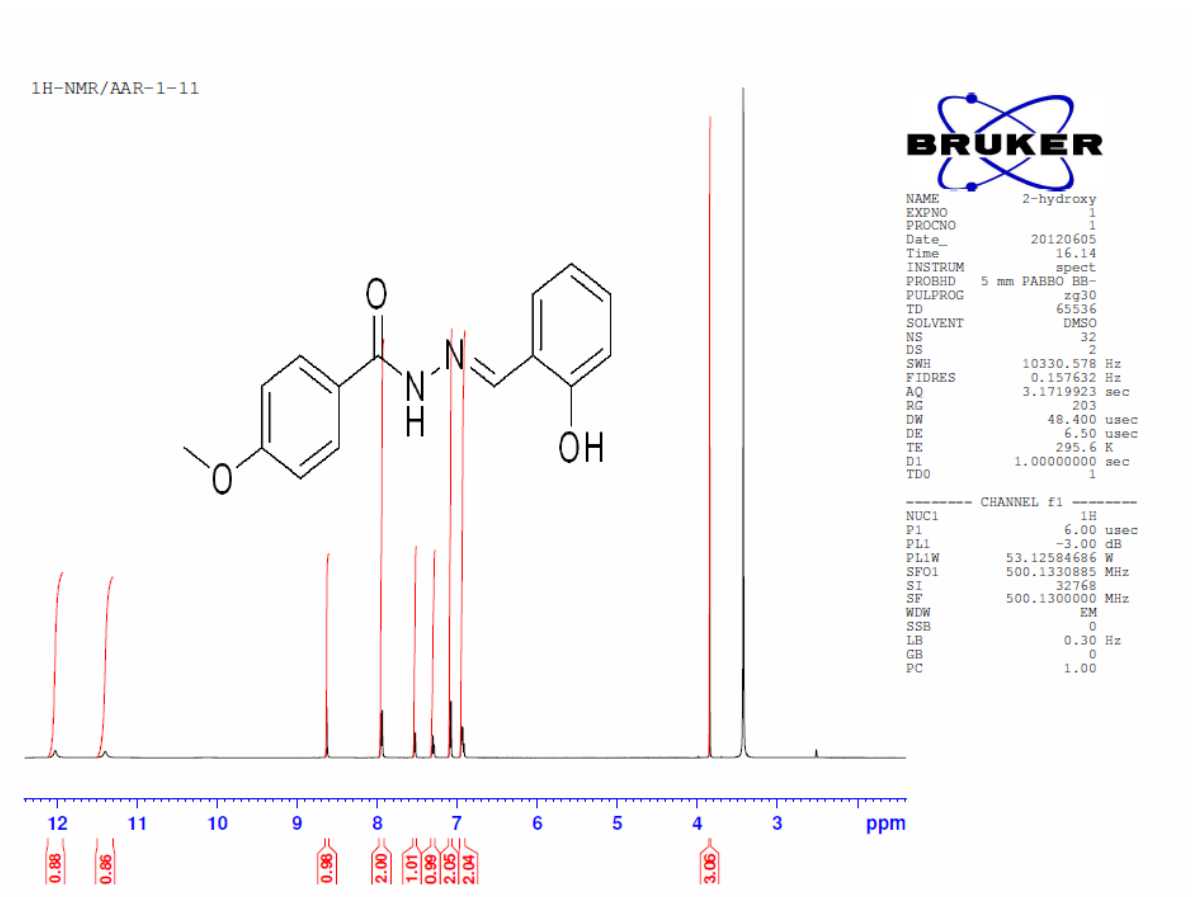

Figure S11. Compound 17.

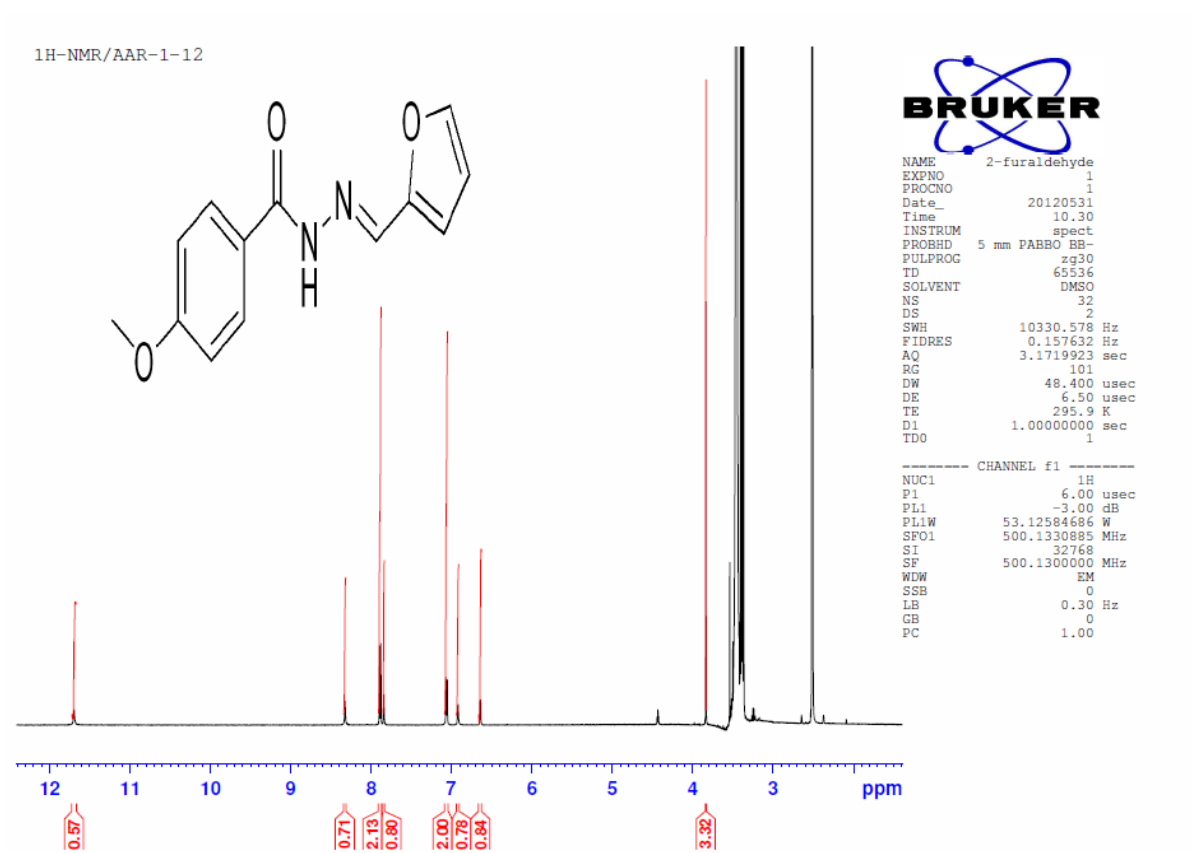

Figure S12. Compound 14.

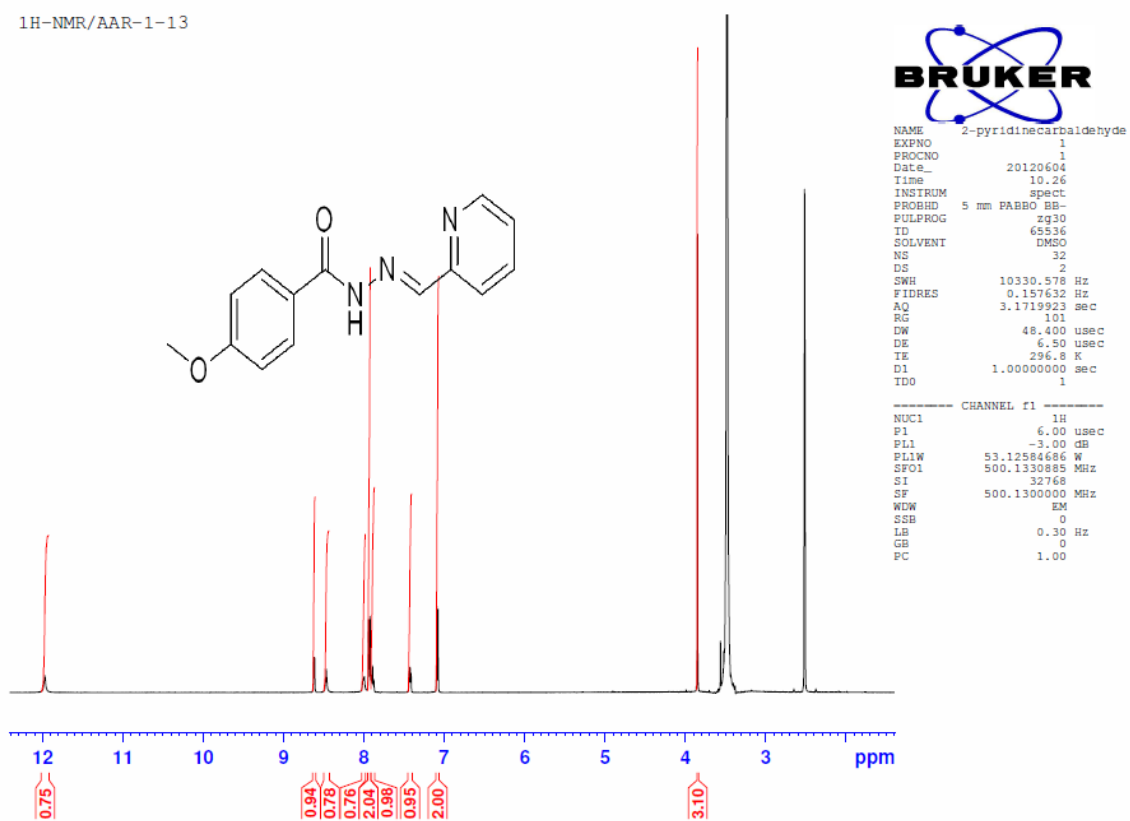

Figure S13. Compound 15.

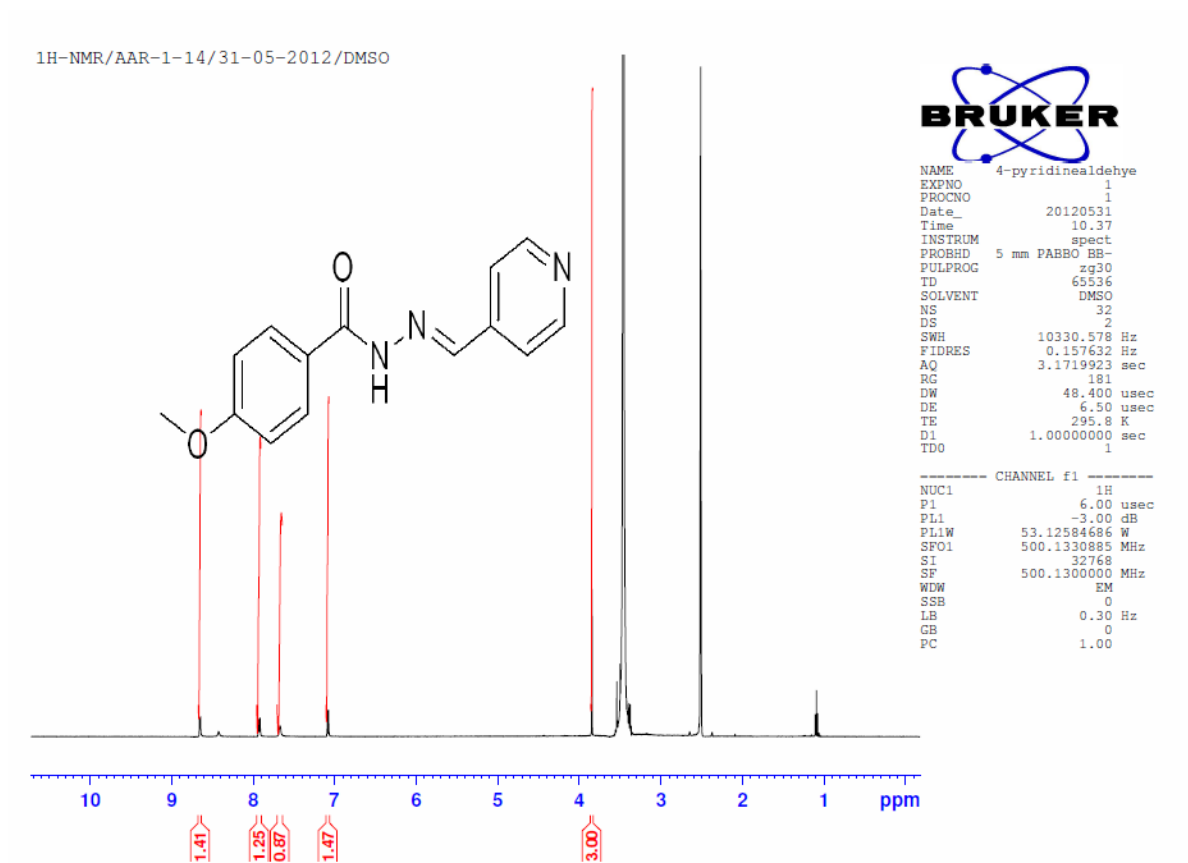

Figure S14. Compound 26.

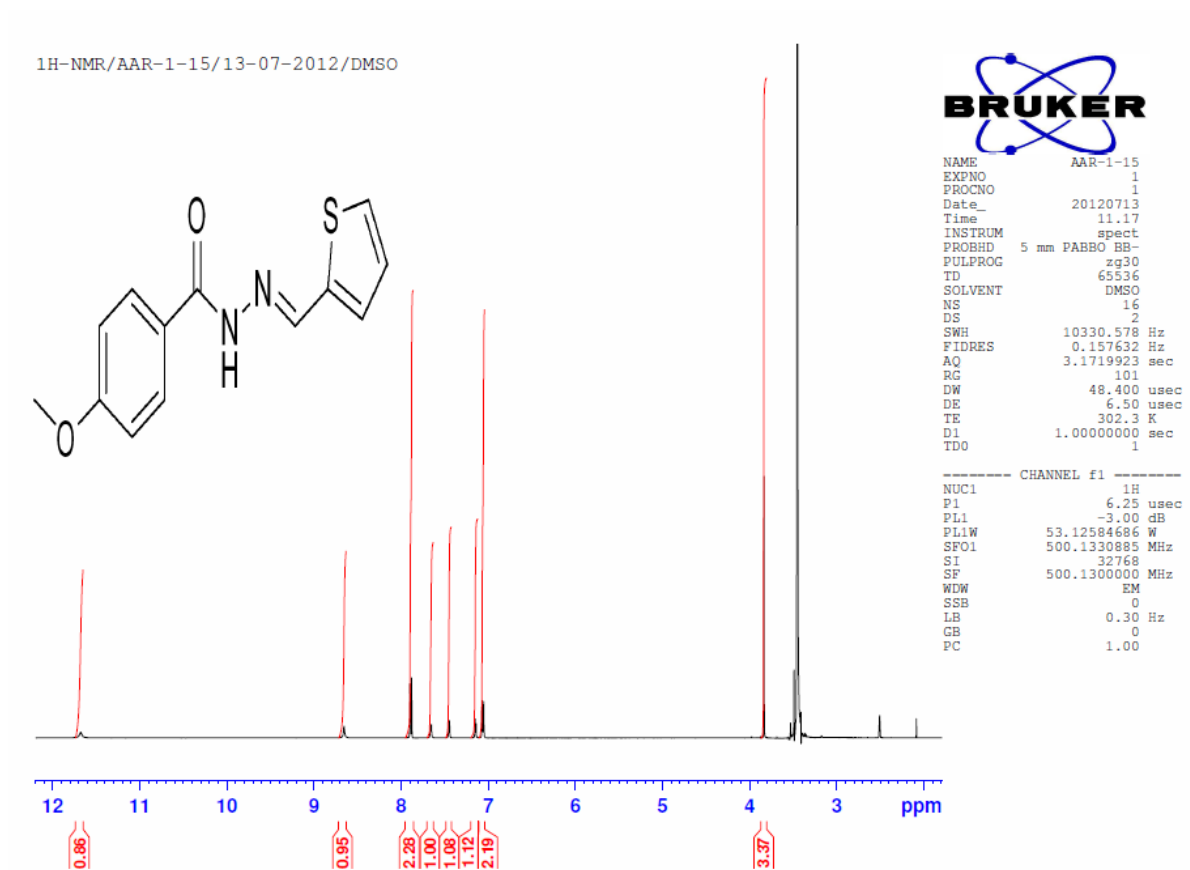

Figure S15. Compound 16.

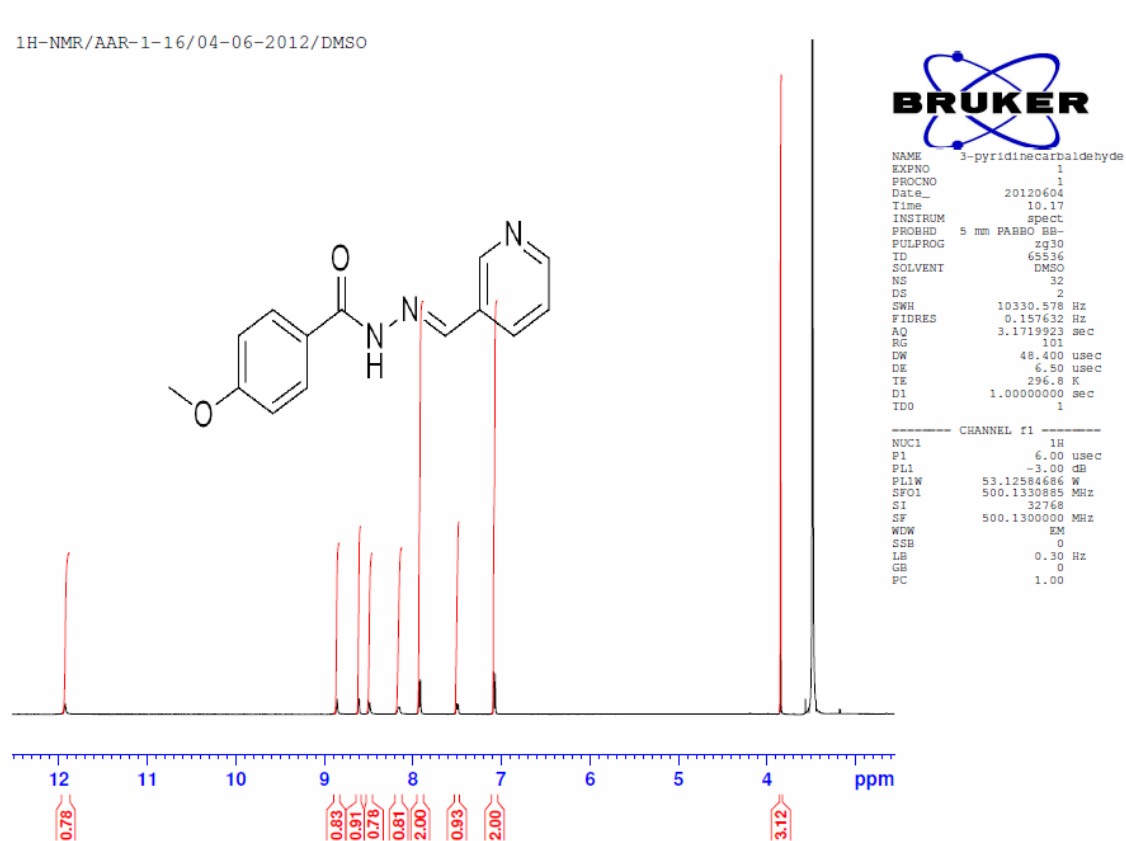

Figure S16. Compound 20.

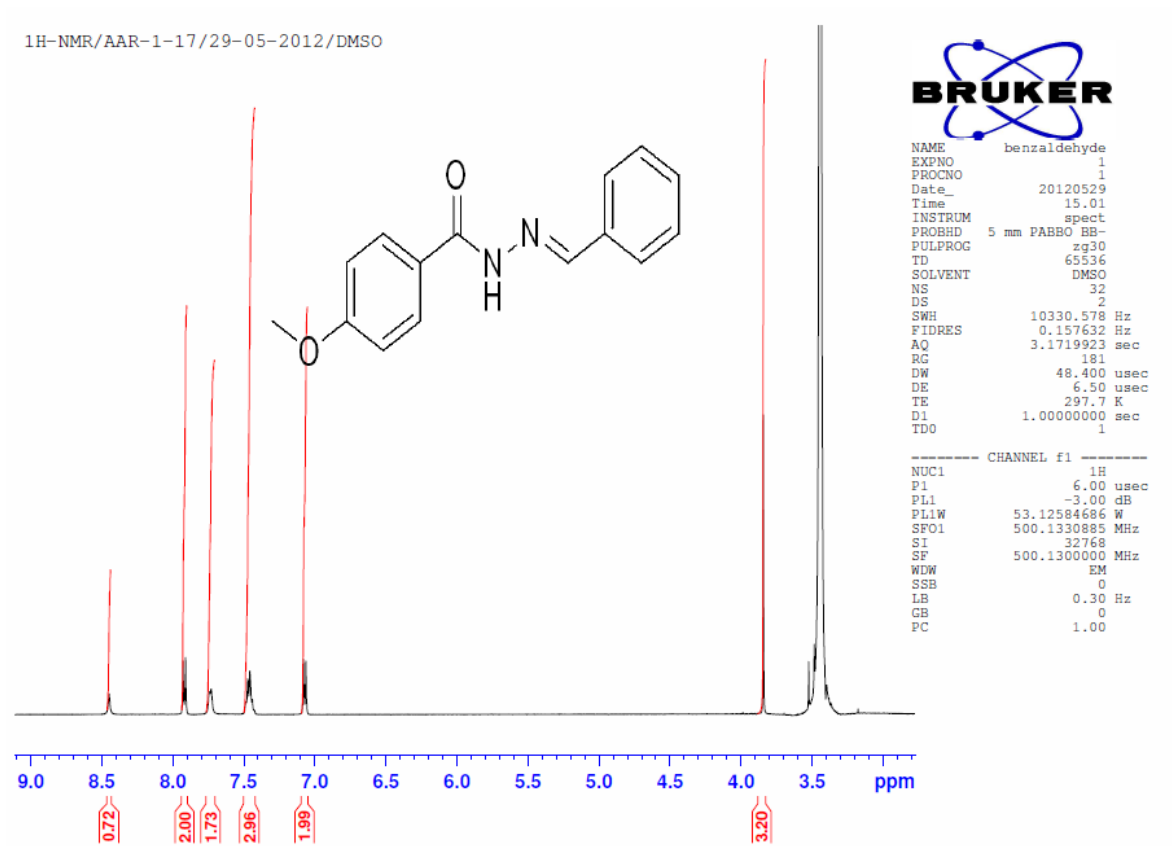



Figure S17. Compound 19.

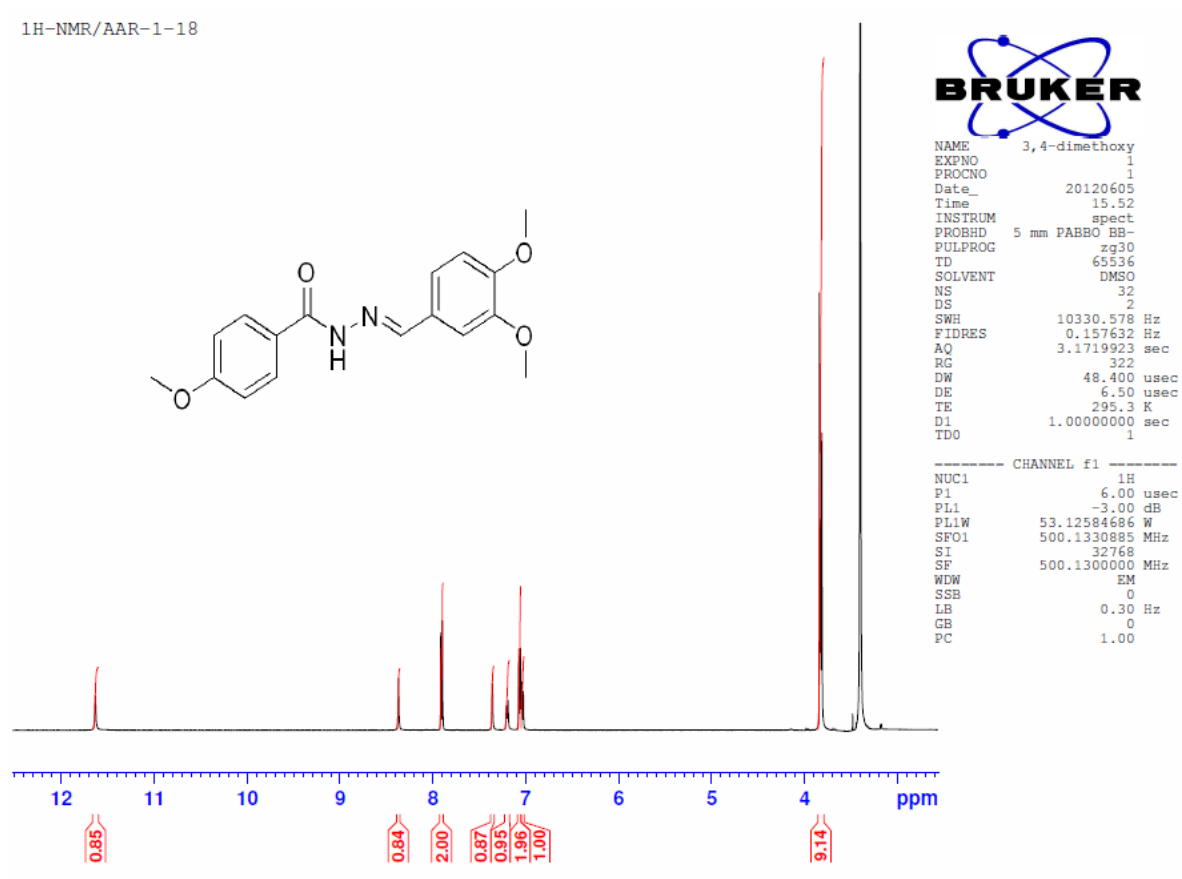

Figure S18. Compound 10.

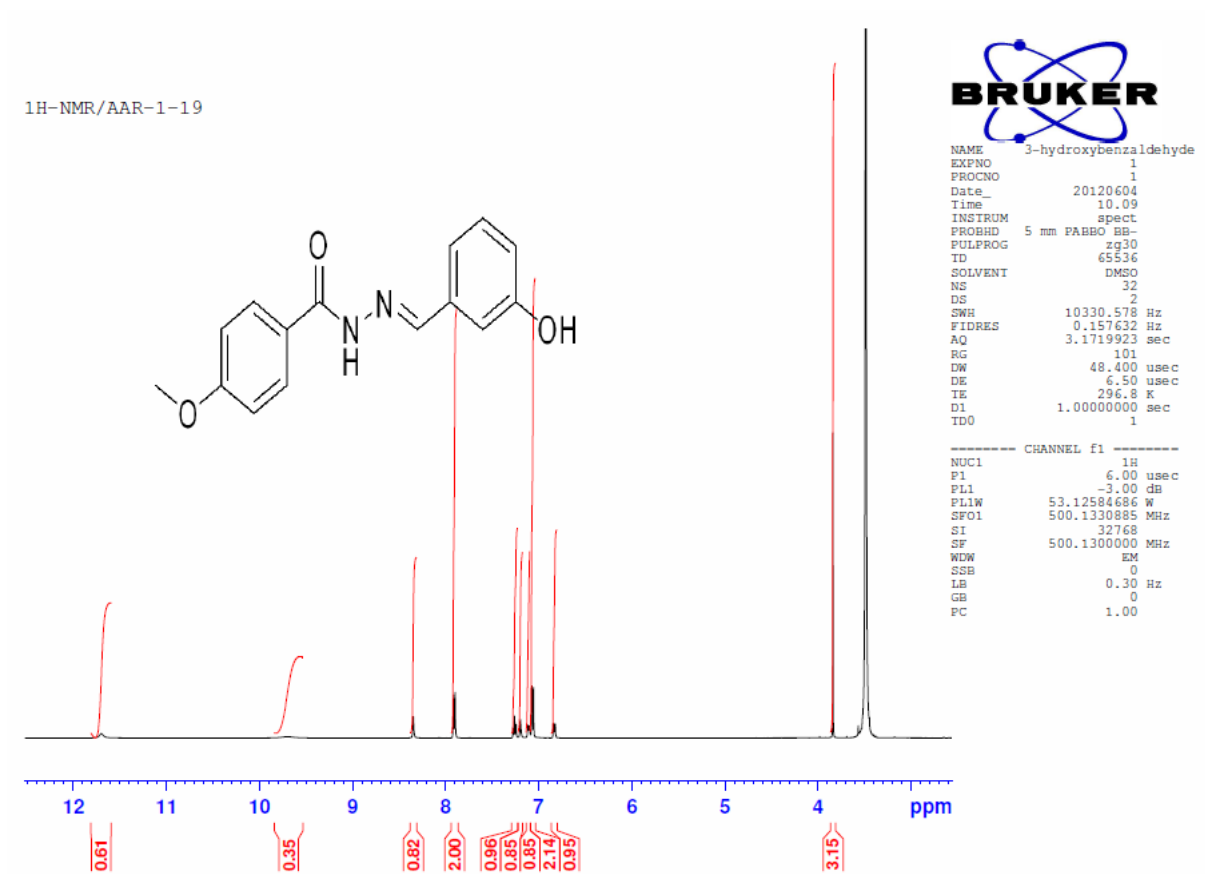

Figure S19. Compound 21.

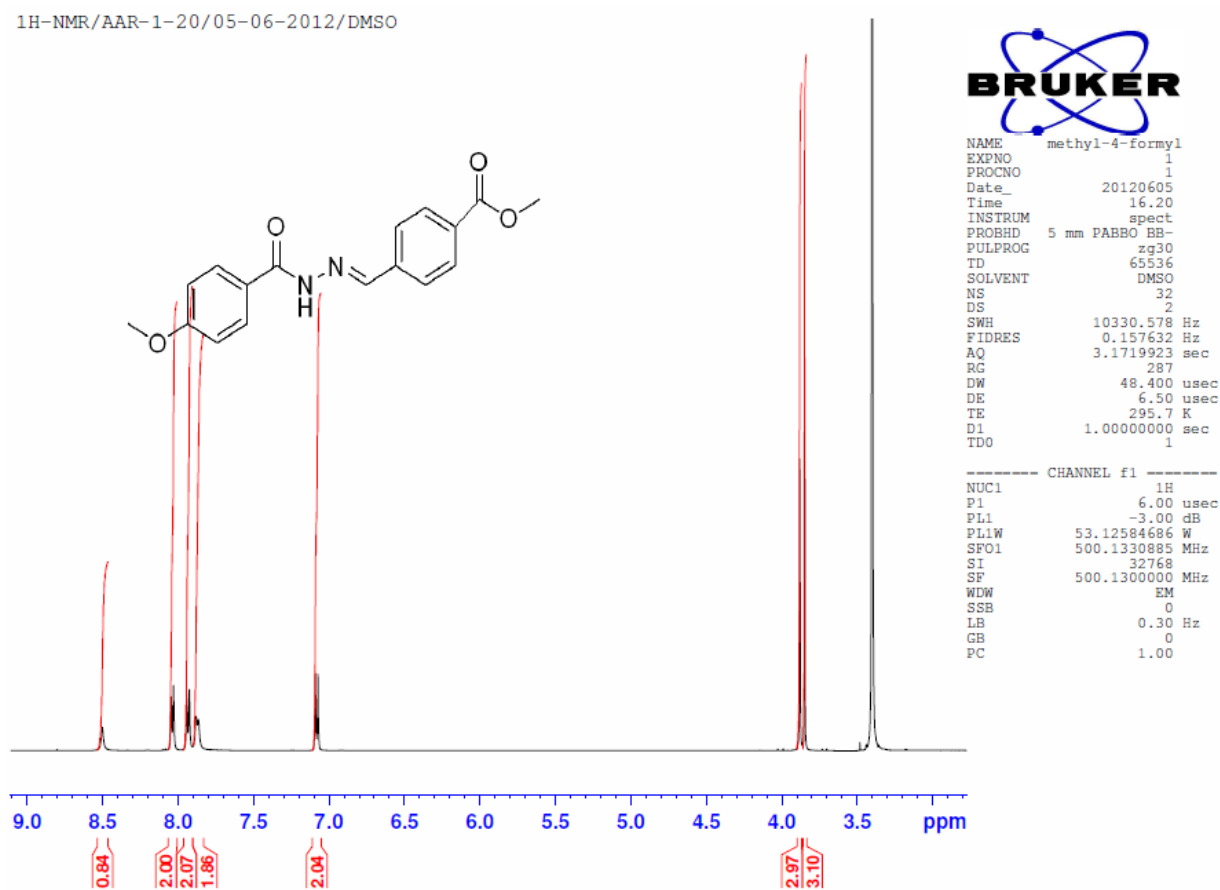

Figure S20. Compound 22.

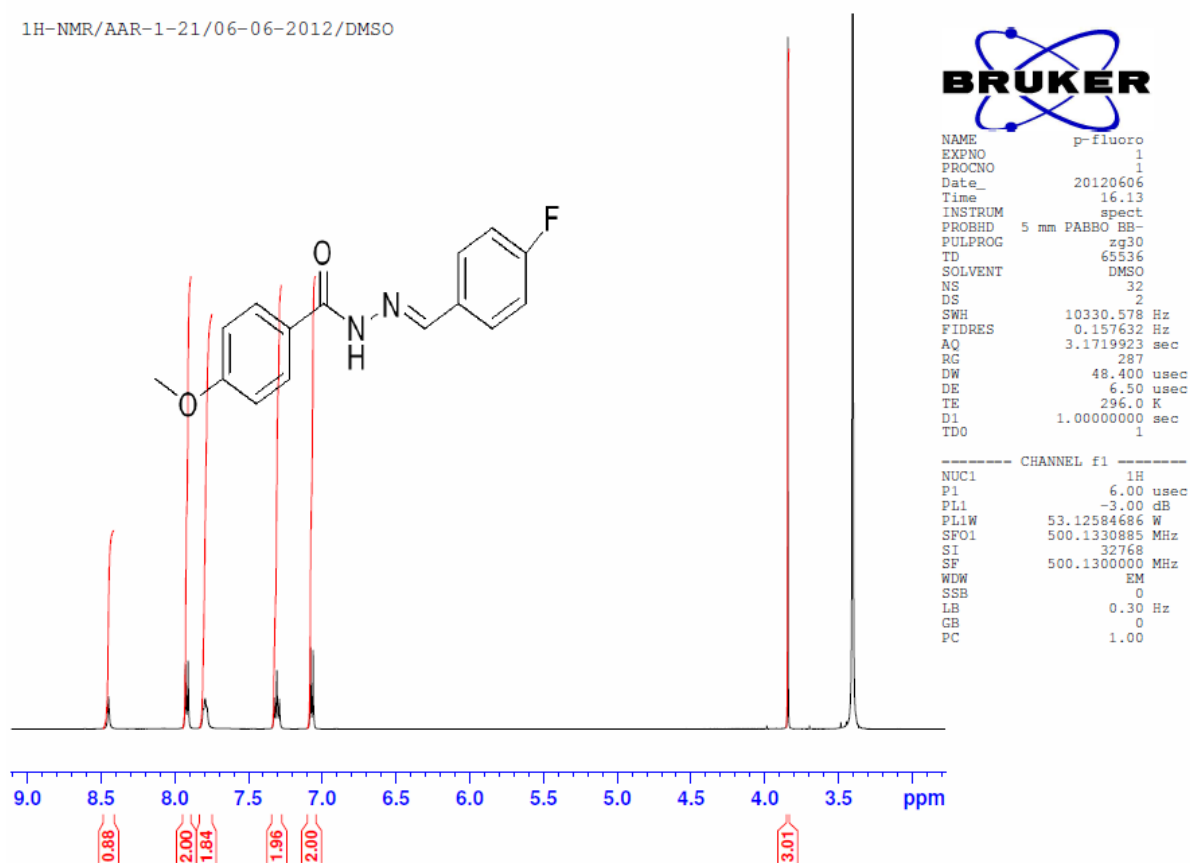

Figure S21. Compound 13.

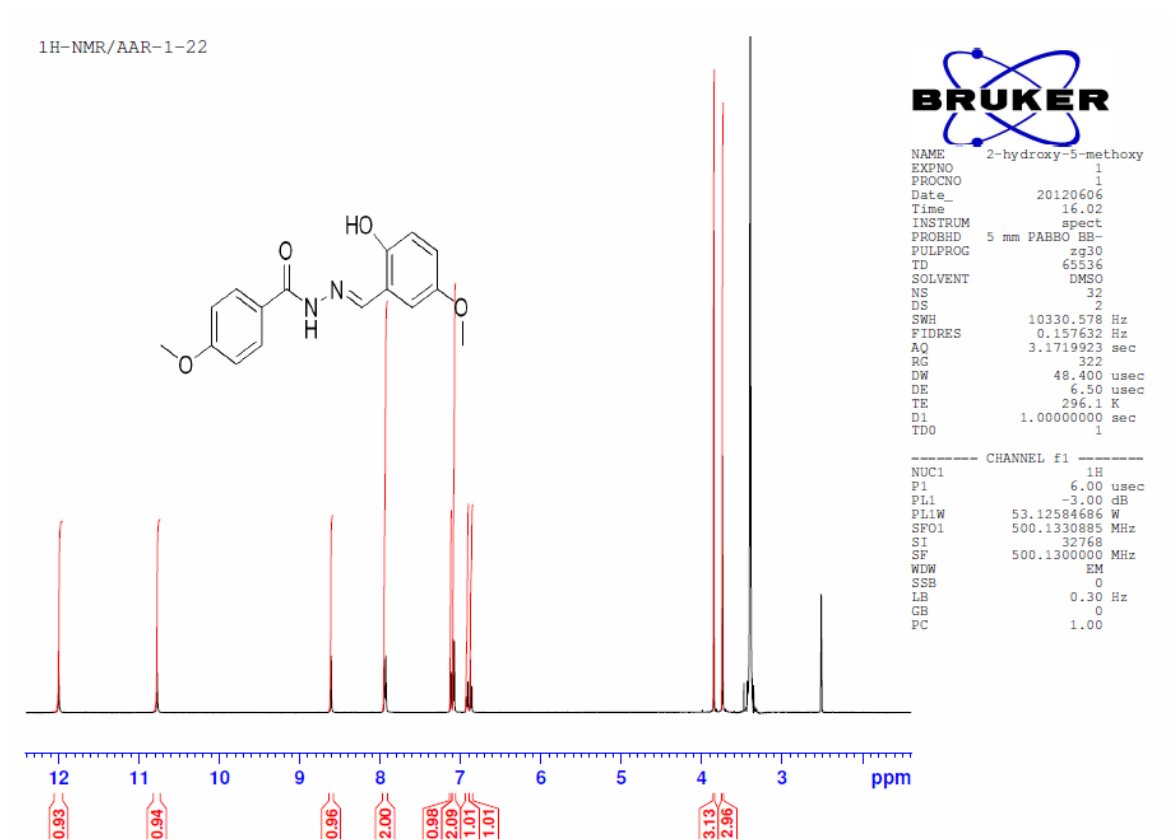

Figure S22. Compound 23.

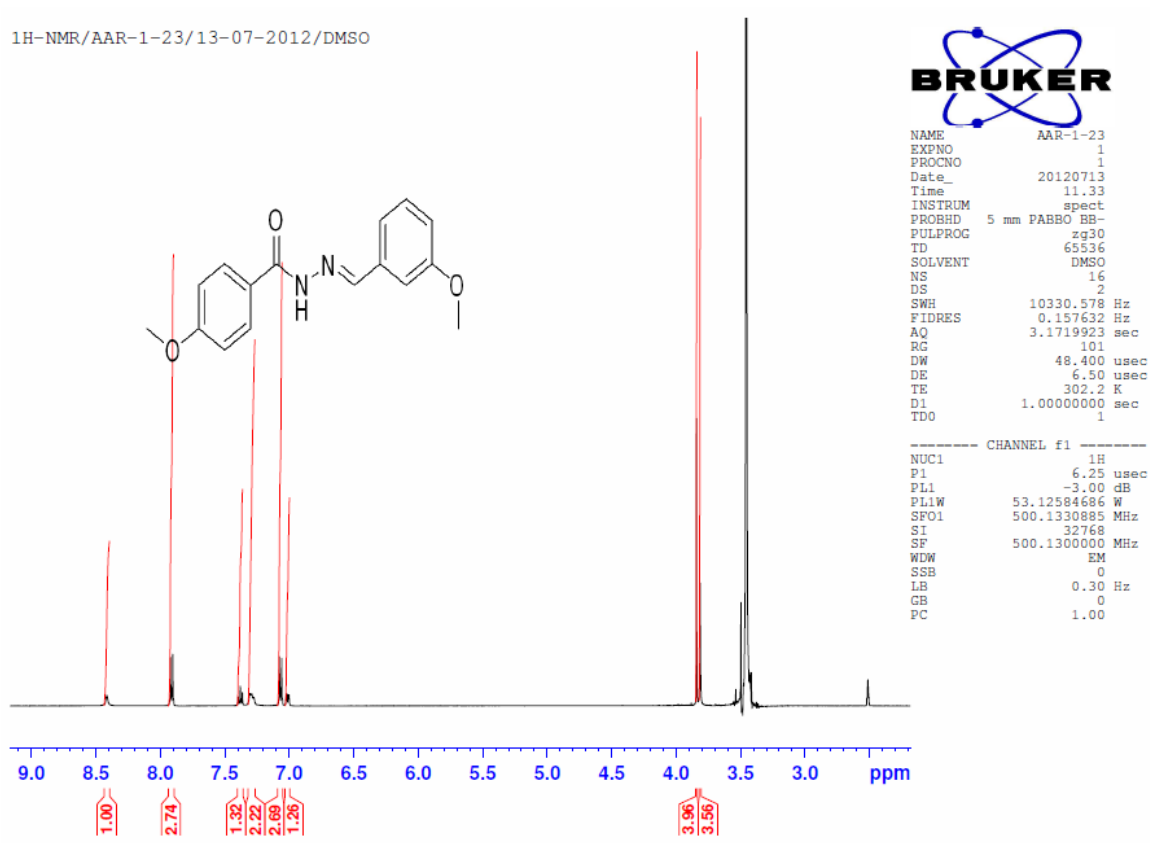

Figure S23. Compound 24.

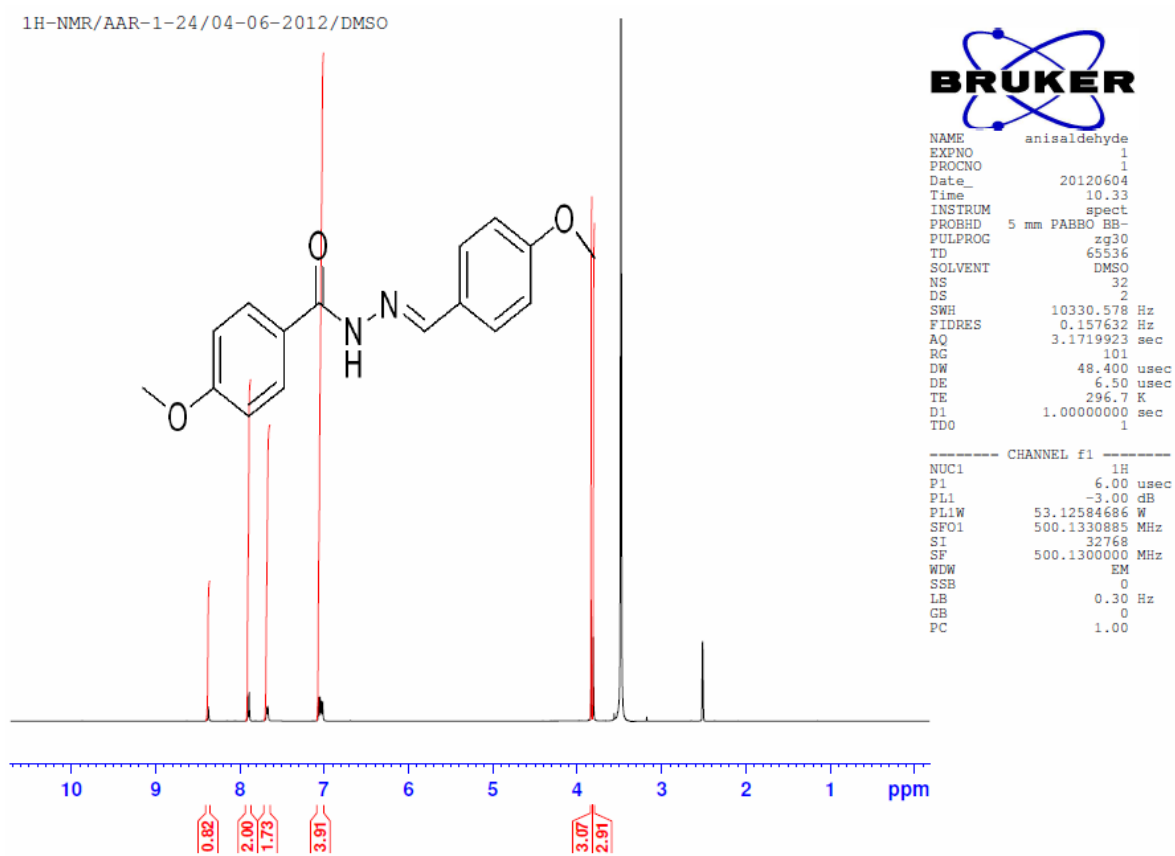

Figure S24. Compound 25.

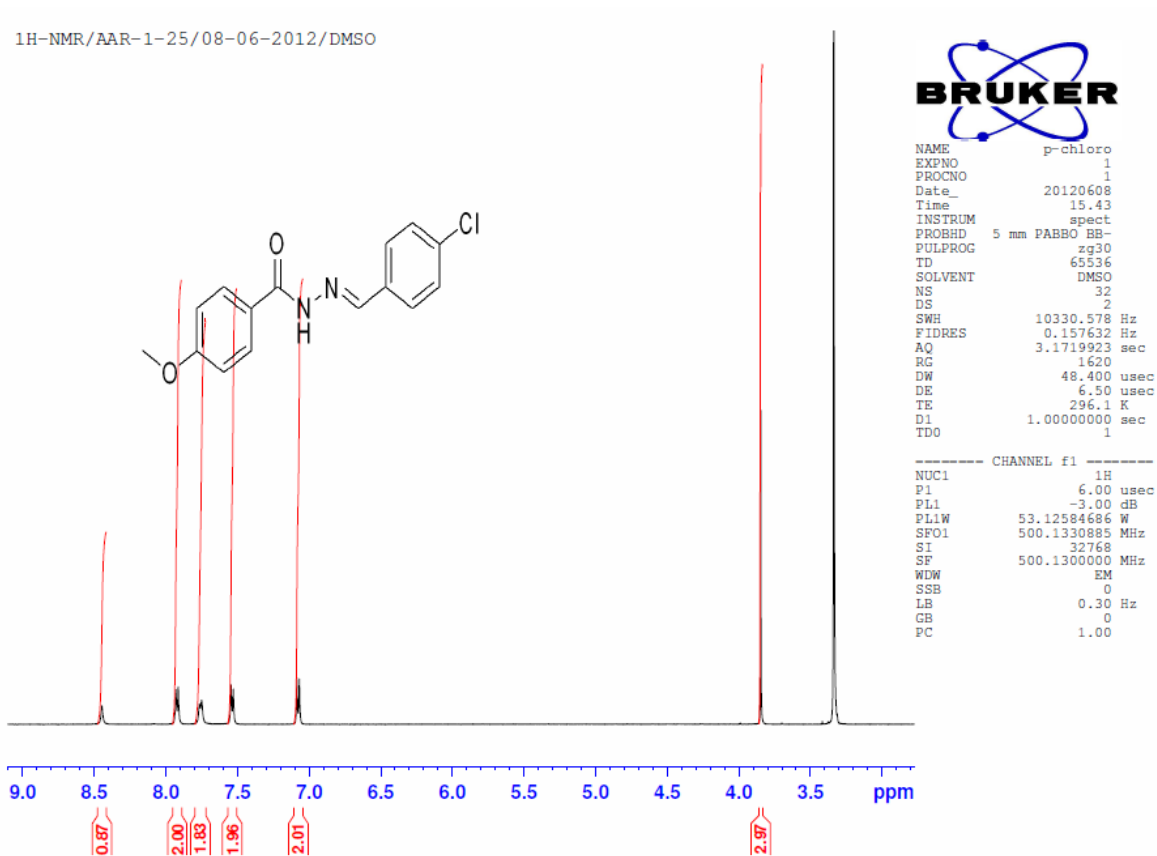



Figure S25. Compound 7.

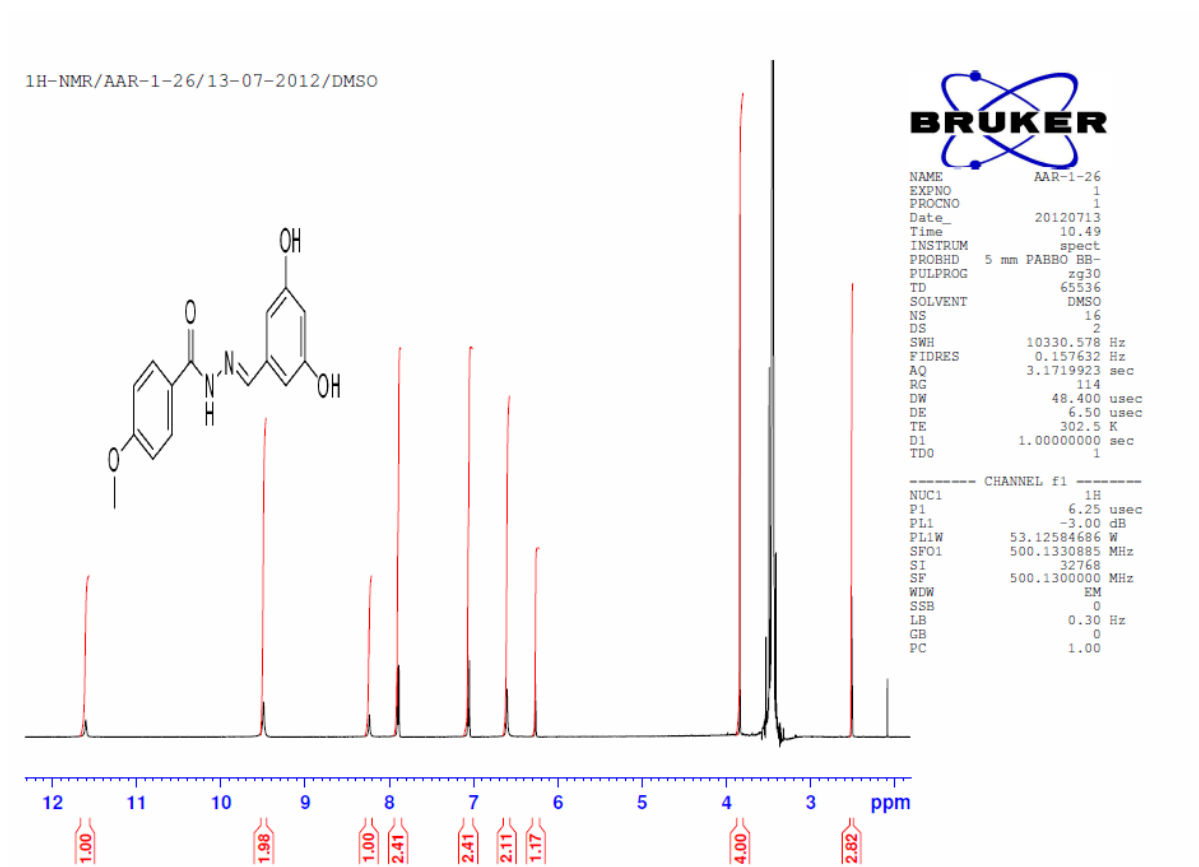

Figure S26. Compound 18.

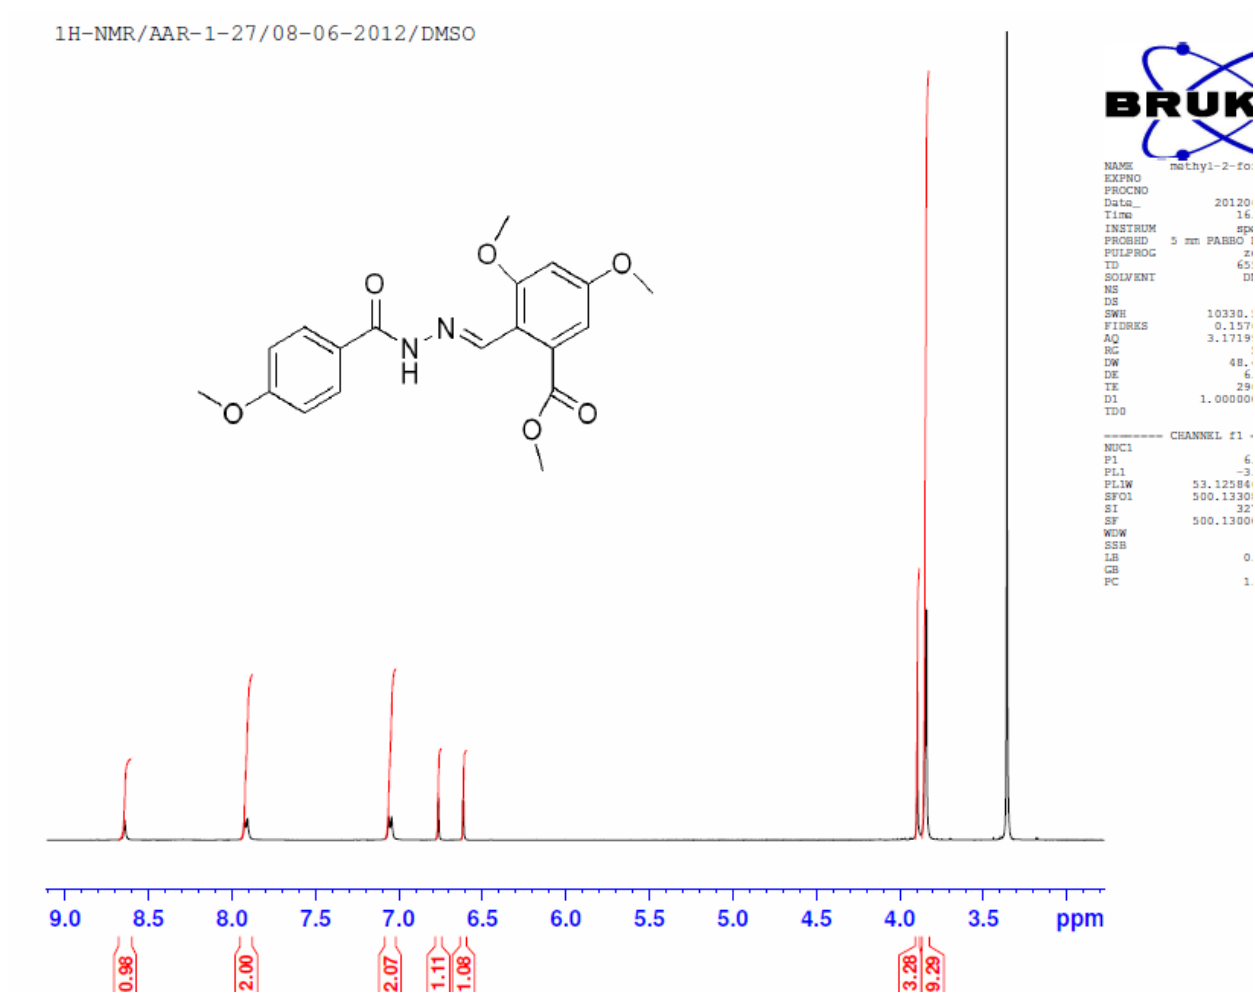

Figure S27. Compound 27.

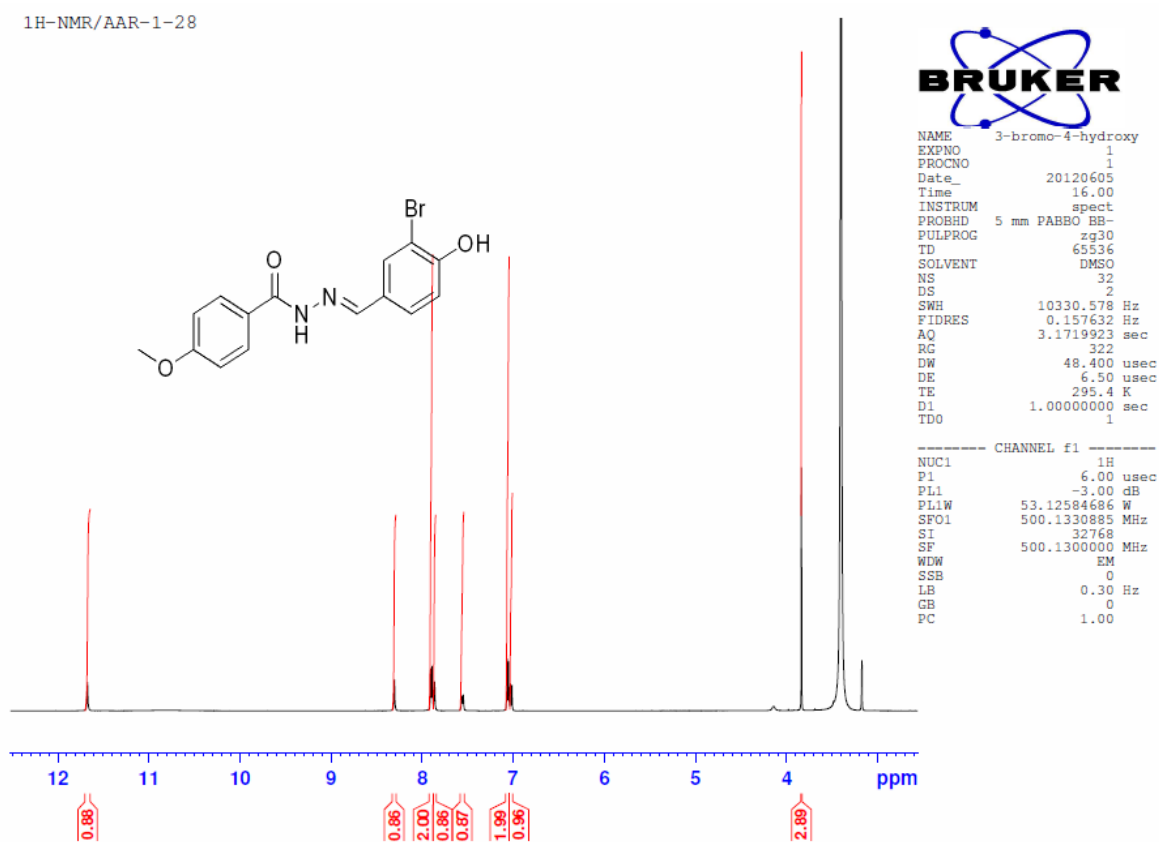

Figure S28. Compound 1.

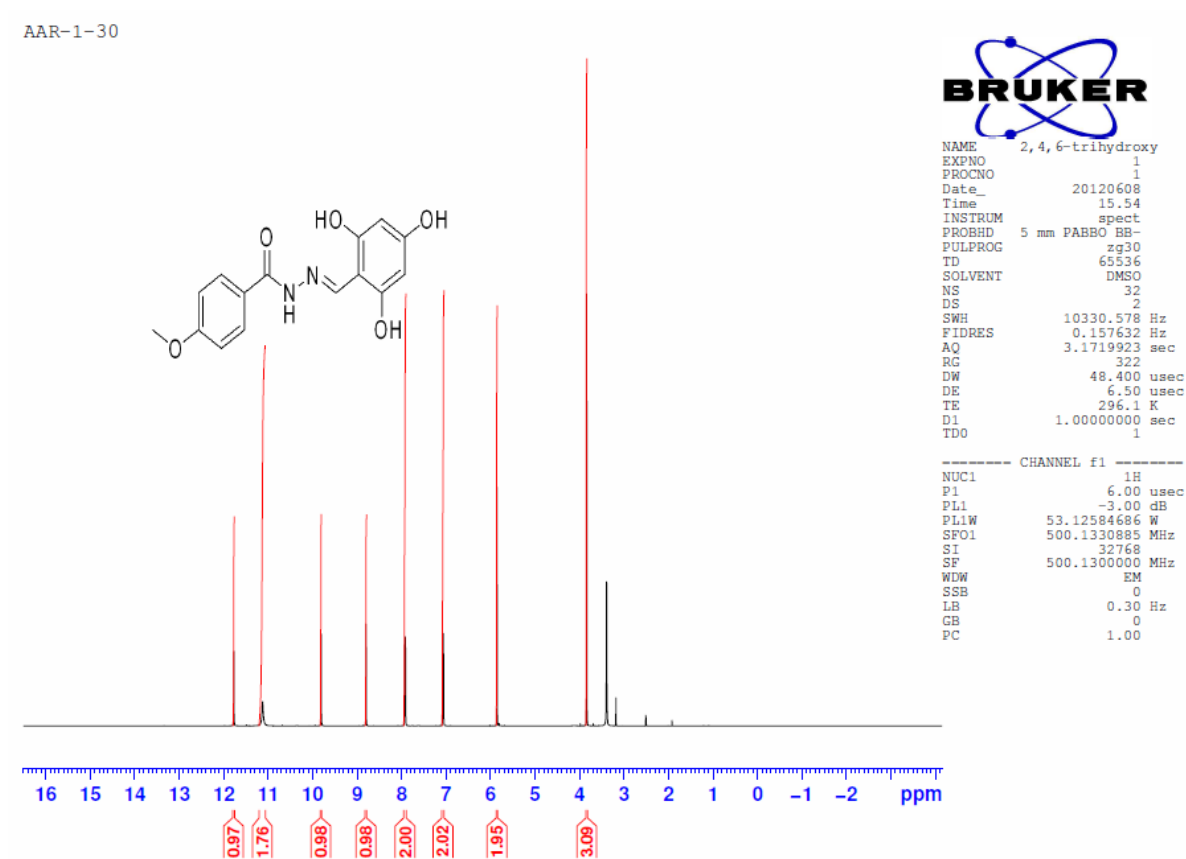

Supplement: s1 [file s1]
